# Supplementary material
Source: PubMed Central journal article supplement (PMC9020467)
Supplement: NIHMS1787176-supplement-3.pdf [file NIHMS1787176-supplement-3.pdf]

**Supplemental Table 1: Demographic and clinical features of PwMS**

| Cohort | Race  | Gender | MS Type | N                   | Age Onset           | Age Diagnosis       |
|--------|-------|--------|---------|---------------------|---------------------|---------------------|
| VALOMS | AA    | Male   | RR      | 13                  | 34.1 ± 3.0          | 37.7 ± 2.4          |
|        |       |        | SP      | 7                   | 31.9 ± 4.0          | 35.6 ± 4.4 <b>a</b> |
|        |       |        | Both    | 20                  | 34.0 ± 2.3          | 37.0 ± 2.1          |
|        |       | Female | RR      | 8                   | 28.1 ± 2.1          | 32.6 ± 2.6          |
|        |       |        | SP      | 5                   | 32.4 ± 5.3          | 38.6 ± 5.6          |
|        |       |        | Both    | 13                  | 29.8 ± 2.3          | 34.9 ± 2.7          |
|        |       | Both   | RR      | 21                  | 31.8 ± 2.1          | 35.8 ± 1.8          |
|        |       |        | SP      | 12                  | 32.1 ± 3.0          | 36.8 ± 3.3 <b>a</b> |
|        |       |        | Both    | 33                  | 32.3 ± 1.7          | 36.2 ± 1.7 <b>a</b> |
|        | White | Male   | RR      | 24                  | 34.0 ± 2.4          | 39.3 ± 2.3          |
|        |       |        | SP      | 20                  | 39.2 ± 2.3 <b>h</b> | 44.2 ± 1.9          |
|        |       |        | Both    | 44 *                | 36.4 ± 1.7          | 41.5 ± 1.6          |
|        |       | Female | RR      | 6                   | 31.0 ± 4.1          | 36.5 ± 3.1          |
|        |       |        | SP      | 7                   | 30.2 ± 4.0          | 44.0 ± 3.1          |
|        |       |        | Both    | 13                  | 30.6 ± 2.7          | 40.5 ± 2.4          |
| Both   |       | RR     | 30      | 33.4 ± 2.1          | 38.7 ± 2.0 <b>d</b> |                     |
|        |       | SP     | 27      | 36.9 ± 2.1 <b>h</b> | 44.1 ± 1.6          |                     |
|        |       | Both   | 57      | 35.1 ± 1.5          | 41.2 ± 1.3          |                     |
| ACP    | AA    | Male   | RR      | 17                  |                     | 35.9 ± 2.6          |
|        |       | Female | RR      | 92                  |                     | 36.1 ± 1.0          |
|        |       | Both   | RR      | 109                 |                     | 36.1 ± 0.9          |
| UCSF   | White | Male   | RR      | 209                 | 32.9 ± 0.6 (208)    |                     |
|        |       | Female | RR      | 445                 | 32.6 ± 0.4 (437)    |                     |
|        |       | Both   | RR      | 654                 | 32.7 ± 0.4 (645)    |                     |

\*, Demographic data was available for 44 of the 45 male White patients.

**a**, P<0.05 versus corresponding VA White patients;

**b**, P<0.05 versus corresponding VA AA SPMS patients;

**c**, P<0.05 versus all VA White SPMS patients;

**d**, P<0.05 versus corresponding VA White SPMS patients;

**e**, P<0.05 versus corresponding White male SPMS patients;

**f**, P<0.05 versus corresponding ACP patients;

**g**, P<0.05 versus White female patients;

**h**, P<0.05 versus corresponding White patients.

Data is mean ± se. N is number in all groups unless otherwise indicated

ACP: Accelerated Cure Project; Dx: age at diagnosis; Sx: age at first sx

ACT, Accelerated Cure Project; DX, age at diagnosis; OX, age at onset; multiple sclerosis severity score; RR, relapsing remitting; SP, secondary

| Years Dx-Sx | Duration from Diagnosis | Duration from Onset | EDSS                  | MSSS               |
|-------------|-------------------------|---------------------|-----------------------|--------------------|
| 2.5 ± 2.0   | 7.1 ± 1.6               | 9.5 ± 2.2           | 3.3 ± 0.5 <b>b</b>    | 4.3 ± 0.8 <b>b</b> |
| 3.7 ± 1.1   | 8.1 ± 1.9               | 11.9 ± 2.5          | 6.5 ± 0.6 <b>f</b>    | 8.0 ± 0.5          |
| 3.0 ± 1.4   | 7.4 ± 1.2               | 10.3 ± 1.7          | 4.4 ± 0.5             | 5.8 ± 0.7          |
| 4.5 ± 2.1   | 8.5 ± 1.8               | 13 ± 2.7            | 3.8 ± 0.7 <b>b</b>    | 4.3 ± 0.8          |
| 6.2 ± 2.1   | 9.4 ± 2.4               | 15.6 ± 2.4          | 6.1 ± 0.2 <b>f</b>    | 6.5 ± 0.4          |
| 5.2 ± 1.5   | 8.8 ± 1.4               | 14 ± 1.9            | 4.7 ± 0.5             | 5.1 ± 0.6          |
| 3.3 ± 1.5   | 7.6 ± 1.2               | 10.8 ± 1.7          | 3.5 ± 0.4 <b>b</b>    | 4.3 ± 0.6 <b>b</b> |
| 4.8 ± 1.1   | 8.7 ± 1.4               | 13.4 ± 1.8          | 6.3 ± 0.3 <b>c, f</b> | 7.4 ± 0.4 <b>c</b> |
| 3.8 ± 1.0   | 7.9 ± 0.9               | 11.8 ± 1.3          | 4.5 ± 0.4             | 5.5 ± 0.5          |
| 5.3 ± 1.8   | 8.5 ± 1.4               | 13.8 ± 2.2          | 3.1 ± 0.3 <b>e</b>    | 3.9 ± 0.5 <b>e</b> |
| 5.0 ± 1.0   | 8.3 ± 0.9               | 13.3 ± 1.3          | 5.5 ± 0.4 <b>h</b>    | 6.3 ± 0.5 <b>h</b> |
| 5.2 ± 1.1   | 8.4 ± 0.8               | 13.6 ± 1.3          | 4.2 ± 0.3 <b>h</b>    | 5.0 ± 0.4 <b>h</b> |
| 5.5 ± 2.5   | 6.3 ± 1.6               | 11.8 ± 2.2          | 3.3 ± 0.9             | 3.8 ± 1.4          |
| 13.7 ± 3.6  | 8.6 ± 1.8               | 22.3 ± 4.2 <b>g</b> | 4.9 ± 0.8 <b>h</b>    | 4.5 ± 1.3 <b>h</b> |
| 9.9 ± 2.5   | 7.5 ± 1.2               | 17.5 ± 2.8          | 4.2 ± 0.6 <b>h</b>    | 4.2 ± 0.9          |
| 5.3 ± 1.5   | 8.1 ± 1.1               | 13.4 ± 1.8          | 3.1 ± 0.3 <b>d</b>    | 3.9 ± 0.5 <b>d</b> |
| 7.3 ± 1.4   | 8.3 ± 0.8               | 15.6 ± 1.6          | 5.3 ± 0.3 <b>h</b>    | 5.8 ± 0.5 <b>h</b> |
| 6.2 ± 1.0   | 8.2 ± 0.7               | 14.5 ± 1.2          | 4.2 ± 0.3 <b>h</b>    | 4.8 ± 0.4 <b>h</b> |
|             | 4.7 ± 1.0               |                     | 3.3 ± 0.8 (5)         |                    |
|             | 6.4 ± 0.6               |                     | 4.1 ± 0.4 (37)        |                    |
|             | 6.2 ± 0.6               |                     | 4.0 ± 0.4 (42)        |                    |
|             |                         | 13.0 ± 0.7 (208)    | 2.9 ± 0.1 (208)       | 3.6 ± 0.2 (208)    |
|             |                         | 12.2 ± 0.5 (437)    | 2.7 ± 0.1 (434)       | 3.4 ± 0.1 (435)    |
|             |                         | 12.5 ± 0.4 (645)    | 2.7 ± 0.1 (642)       | 3.5 ± 0.1 (643)    |

l in parentheses. Parametric independent Ttest

mptom onset; EDSS: expanded disability severity scale; MSSS

symptom onset, EDSS, expanded disability severity scale, MDSSE,  
and progressive.
